# Supplementary material for: Global root zone storage capacity from satellite-based evaporation
Source: Copernicus journal article supplement (doi:10.5194/hess-20-1459-2016), 2016-04-19
Supplement: Supplementary file 1 [file hess-20-1459-2016-supplement.zip]

Archive with 3 entries (3 files):
- 160405 v6.4.2 SuMax Draft - Supplements.pdf
- sr_data.zip
- hess-20-1459-2016-supplement-title-page.pdf
