# Supplementary material for: Global root zone storage capacity from satellite-based evaporation
Source: Copernicus journal article supplement (doi:10.5194/hess-20-1459-2016), 2016-04-19
Supplement: Supplementary file 1 [file hess-20-1459-2016-supplement.zip › hess-20-1459-2016-supplement-title-page.pdf]

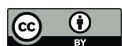

## *Supplement of*

# **Global root zone storage capacity from satellite-based evaporation**

**L. Wang-Erlandsson et al.**

*Correspondence to:* Lan Wang-Erlandsson (lan.wang@su.se)

- hess-20-1459-2016-supplement-title-page.pdf
- 160405 v6.4.2 SuMax Draft - Supplements.pdf
- sr\_data.zip

The copyright of individual parts of the supplement might differ from the CC-BY 3.0 licence.
